# Supplementary material
Source: publisher site journal article supplement (https://www.dovepress.com/article/220714)
Supplement: Supplementary file 1 [file get_supplementary_file.php]

# Supplemental appendix

**Figure S1** Coding trees for administration mode likes and dislikes: (A) oral administration, (B) self-injection), (C) clinic-injection, and (D) infusion


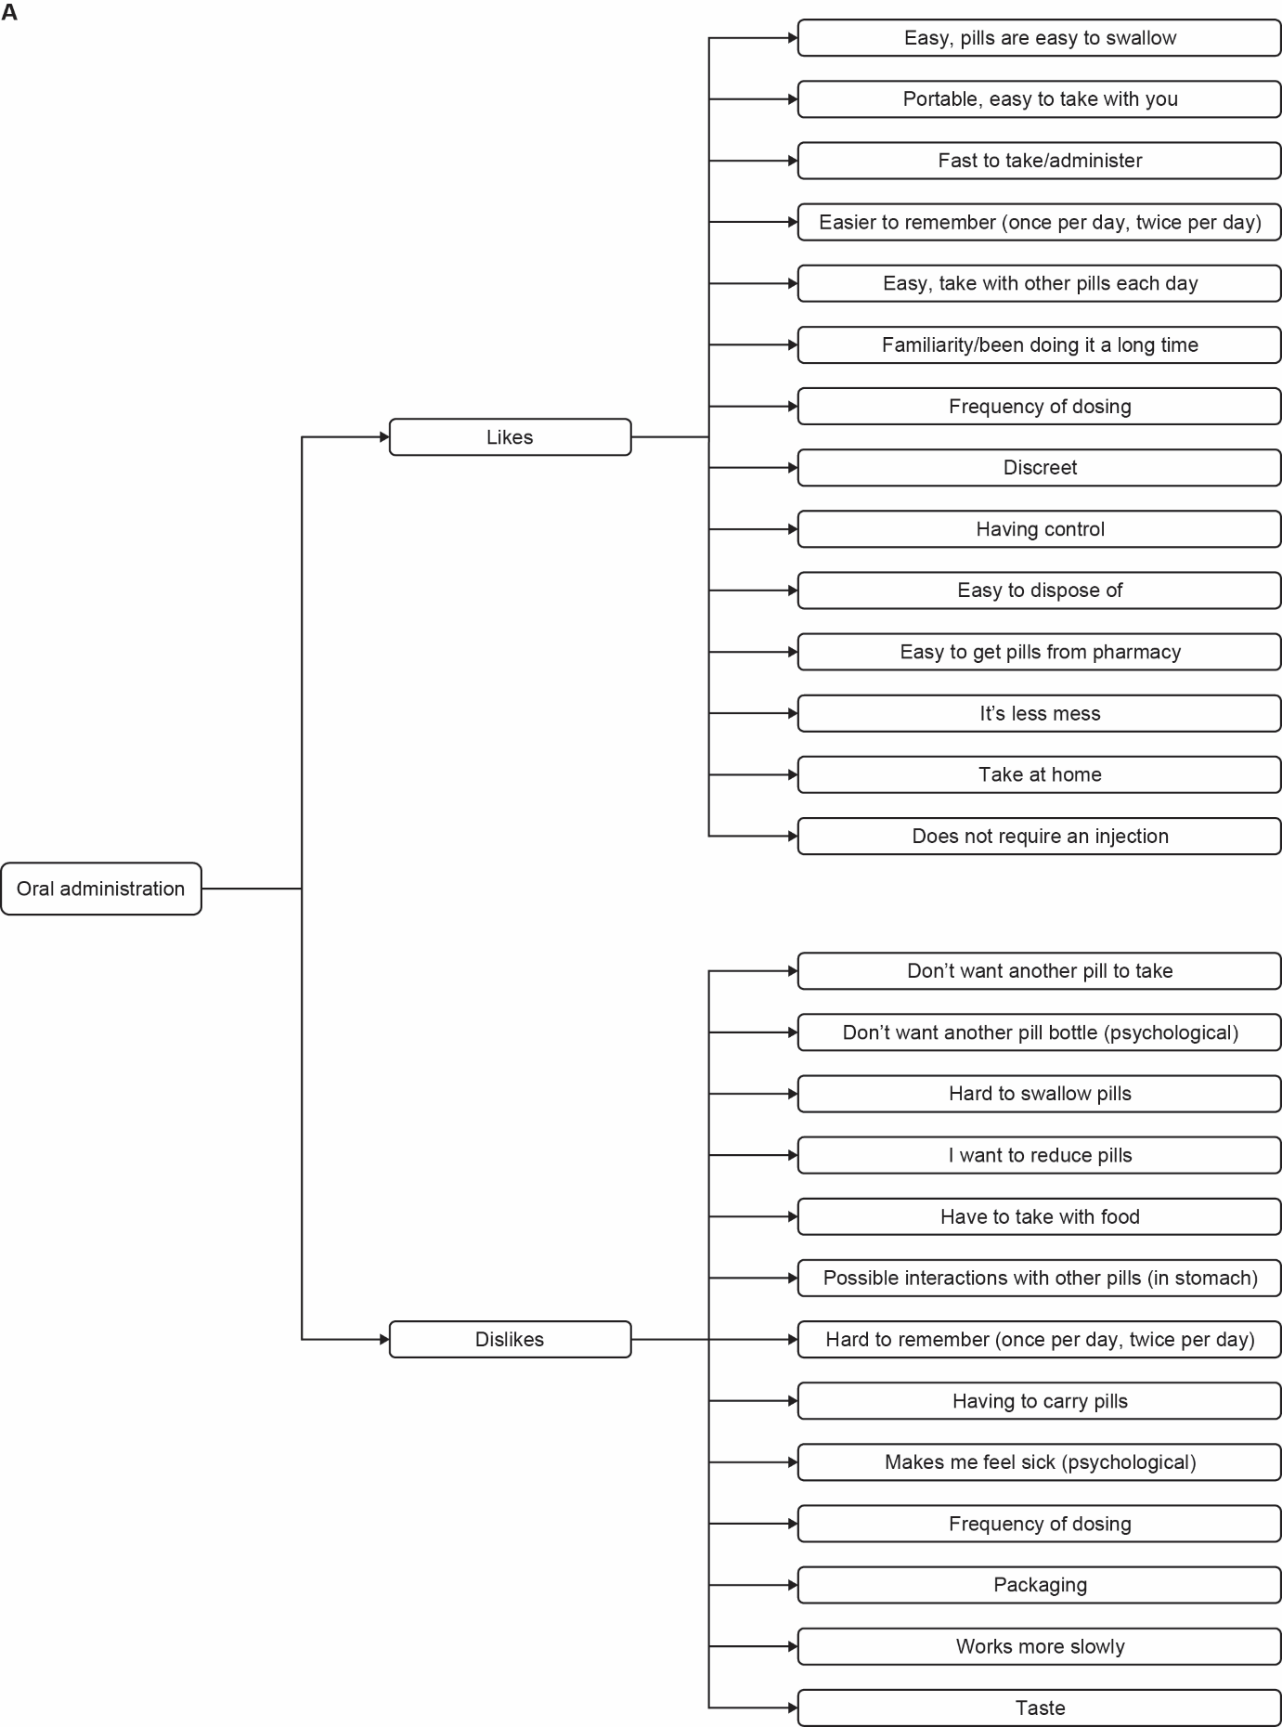


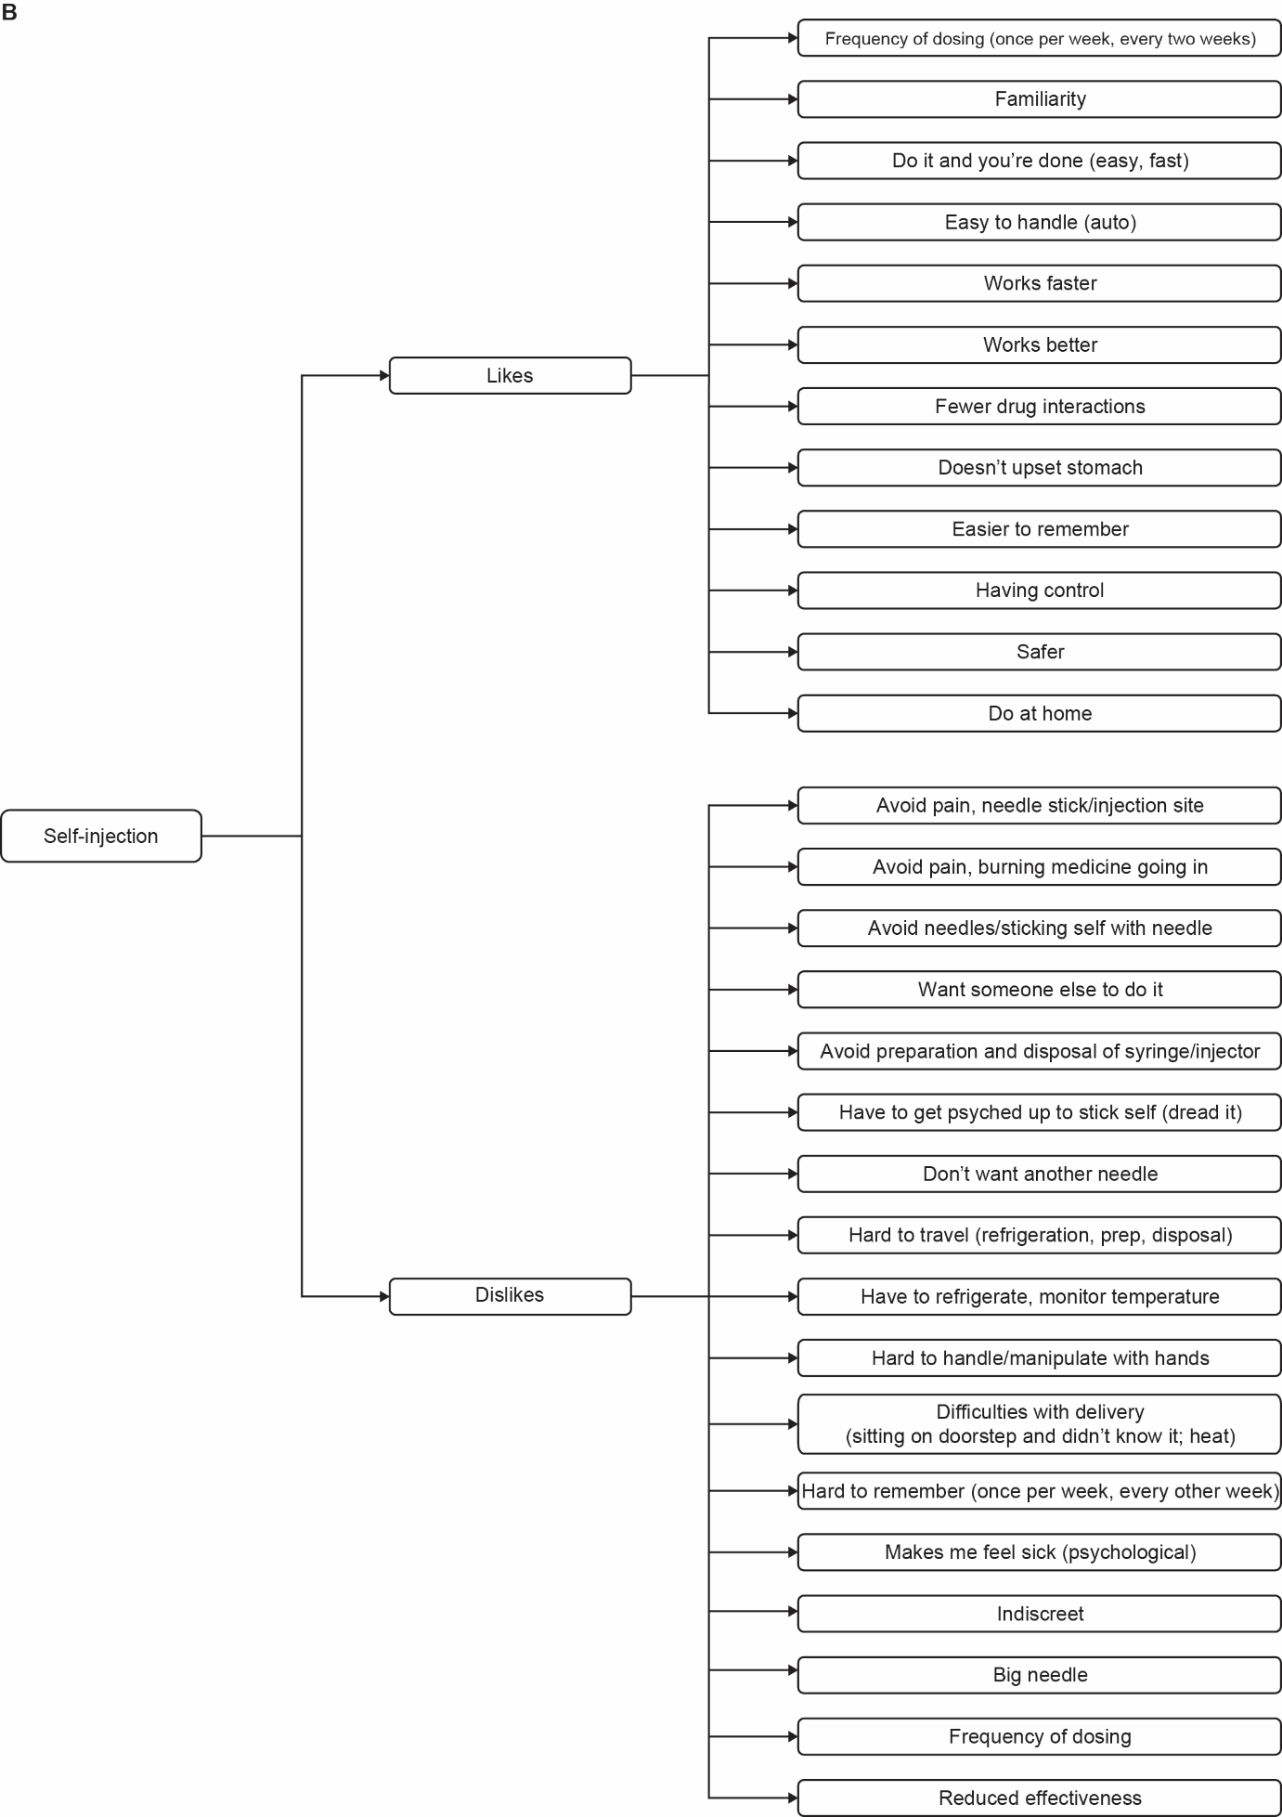


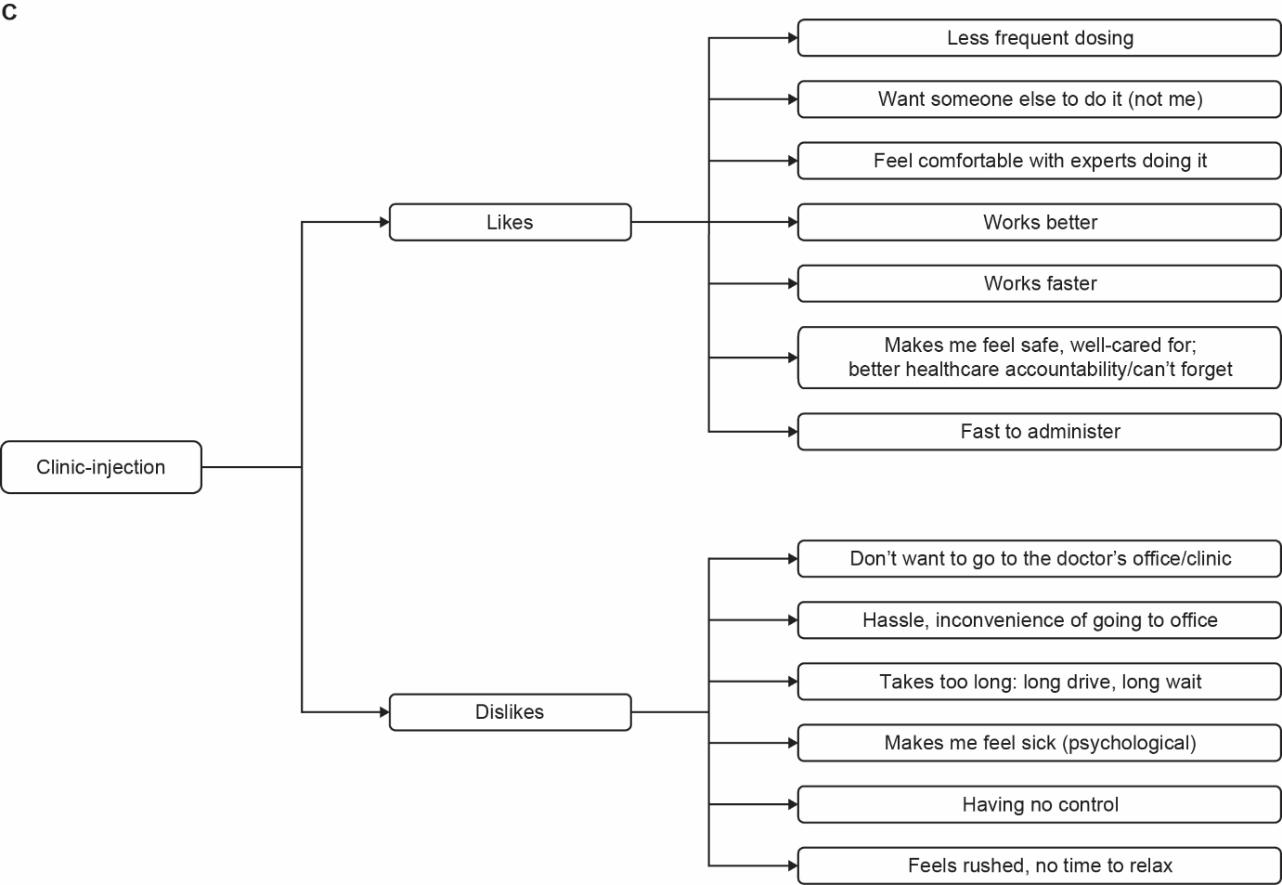

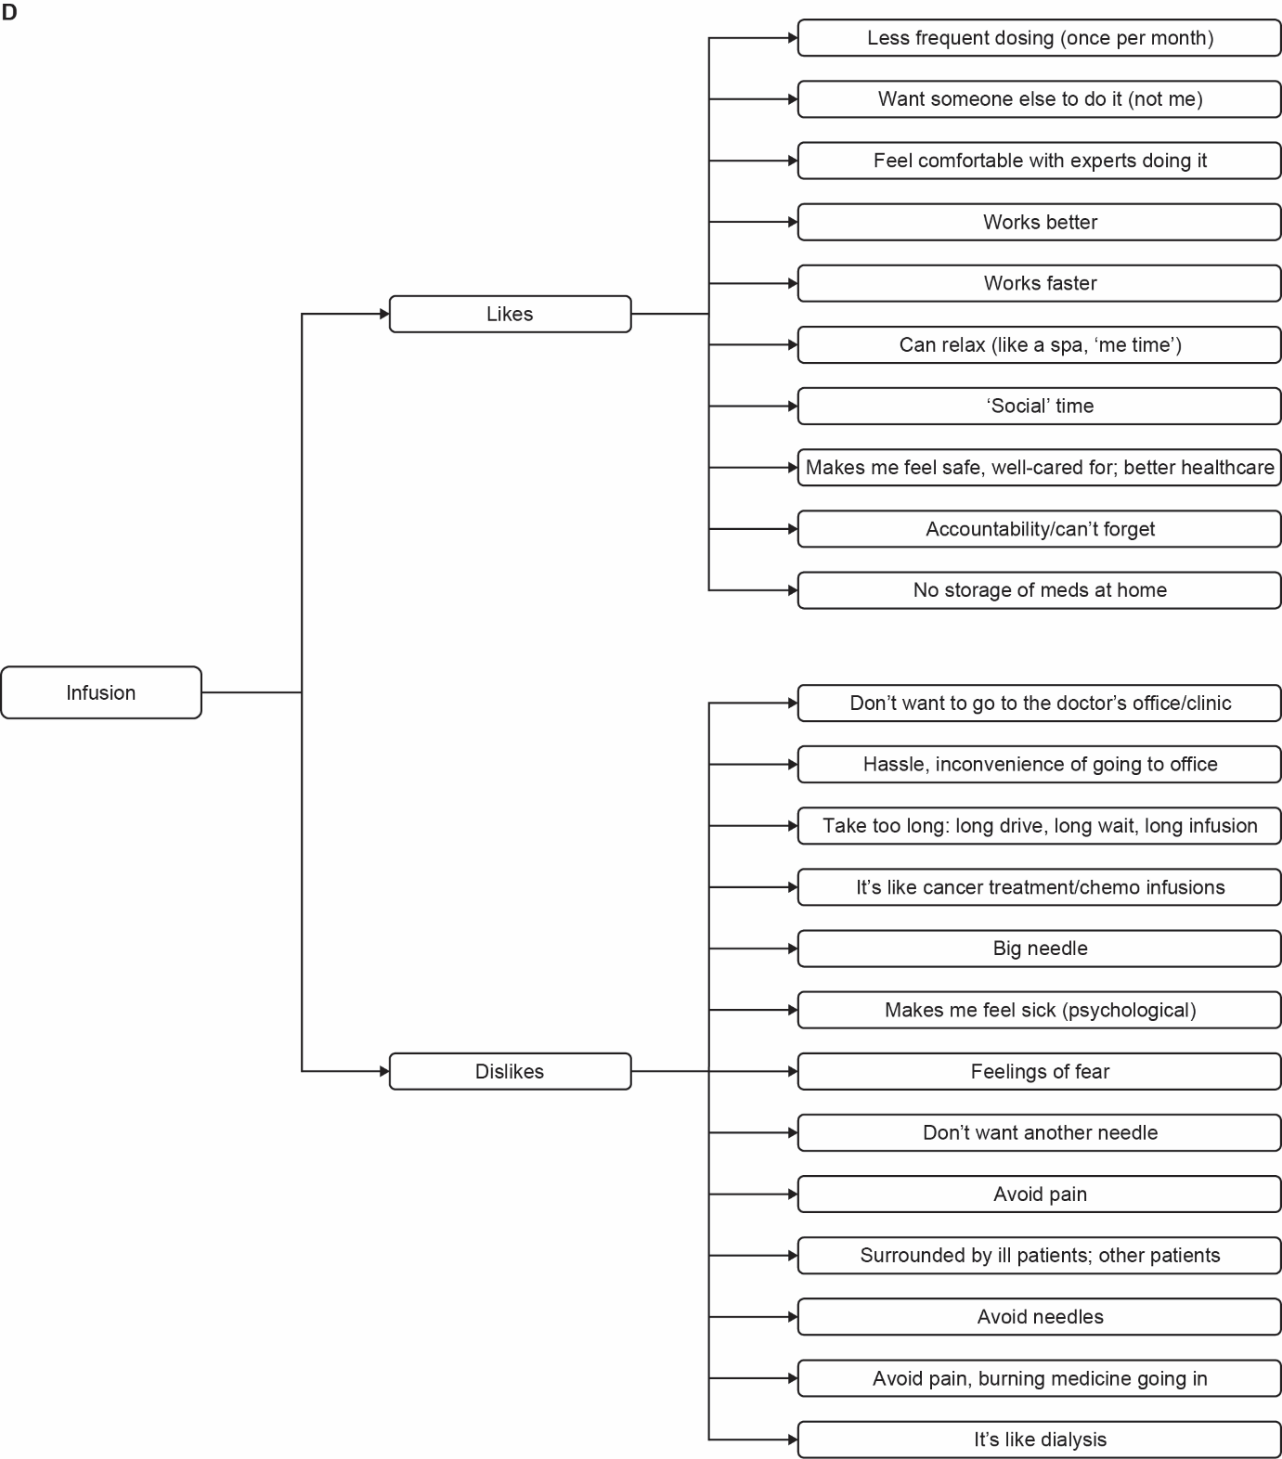


Table S1 Lifestyle and general health characteristicsa

|  | **US (n=30)** | **Europe (n=60)** | **Brazil (n=10)** | **Total (n=100)** |
| --- | --- | --- | --- | --- |
| **Current life stage,b n (%)** |  |  |  |  |
| Before family – no children yet | 1 (3.3) | 1 (1.7) | 0 (0) | 2 (2.0) |
| Never had children | 6 (20.0) | 10 (16.7) | 1 (10.0) | 17 (17.0) |
| Young family – children younger than 11 years | 5 (16.7) | 4 (6.7) | 0 (0) | 9 (9.0) |
| Older family – children 11 to 18 years | 5 (16.7) | 13 (21.7) | 6 (60.0) | 24 (24.0) |
| Children no longer live at home | 10 (33.3) | 18 (30.0) | 3 (30.0) | 31 (31.0) |
| Live with adult children | 3 (10.0) | 14 (23.3) | 0 (0) | 17 (17.0) |
| Prefer not to answer | 0 (0.0) | 0 (0.0) | 0 (0.0) | 0 (0.0) |
| **Currently smoking,b n (%)** |  |  |  |  |
| Smoker | 5 (16.7) | 10 (16.7) | 1 (10.0) | 16 (16.0) |
| Non-smoker | 25 (83.3) | 50 (83.3) | 9 (90.0) | 84 (84.0) |
| Prefer not to answer | 0 (0.0) | 0 (0.0) | 0 (0.0) | 0 (0.0) |
| **Total alcoholic drinks per week,b mean (SD)** | 2.20 (4.3) | 1.32 (2.6) | 0.60 (1.3) | 1.52 (3.2) |
| None, n (%) | 18 (60.0) | 33 (55.9) | 8 (80.0) | 59 (59.6) |
| 1+ drinks, n (%) | 12 (40.0) | 26 (44.1) | 2 (20.0) | 40 (40.4) |
| Prefer not to answer, n (%) | 0 (0.0) | 1 (1.7) | 0 (0.0) | 1 (1.0) |
| **Hours of physical activity per week, n (%)** |  |  |  |  |
| None | 0 (0) | 14 (23.3) | 9 (90.0) | 23 (23.0) |
| Less than 1 hour | 0 (0) | 6 (10.0) | 1 (10.0) | 7 (7.0) |
| 1 to 2 hours | 12 (40.0) | 20 (33.3) | 0 (0) | 32 (32.0) |
| 2 to 3 hours | 5 (16.7) | 5 (8.3) | 0 (0) | 10 (10.0) |
| 4 or more hours | 13 (43.3) | 15 (25.0) | 0 (0) | 28 (28.0) |
| **Other health conditions,**c **n (%)** |  |  |  |  |
| Anxiety | 3 (10.0) | 9 (15.0) | 1 (10.0) | 13 (13.0) |
| Heart problems | 1 (3.3) | 6 (10.0) | 0 (0) | 7 (7.0) |
| Depression | 5 (16.7) | 6 (10.0) | 1 (10.0) | 12 (12.0) |
| Diabetes | 7 (23.3) | 6 (10.0) | 0 (0) | 13 (13.0) |
| High blood pressure | 10 (33.3) | 16 (26.7) | 0 (0) | 26 (26.0) |
| High cholesterol | 8 (26.7) | 13 (21.7) | 1 (10.0) | 22 (22.0) |
| IBD | 1 (3.3) | 4 (6.7) | 0 (0) | 5 (5.0) |
| **Number of prescriptions on daily basis** |  |  |  |  |
| 0 to 2 | 10 (33.3) | 18 (30.0) | 8 (80.0) | 36 (36.0) |
| 3 to 6 | 16 (53.3) | 33 (55.0) | 2 (20.0) | 51 (51.0) |
| 7 or more | 4 (13.3) | 9 (15.0) | 0 (0) | 13 (13.0) |
| **Notes:** aAll variables were patient-reported and were obtained from the recruitment screening items. The reported other health conditions were taken from a pre-specified list of conditions included on the screener. bPercentages for responses other than ‘Prefer not to answer’ do not include any patients who endorsed ‘Prefer not to answer’. cMultiple response item; responses sum to over 100%. **Abbreviations:** IBD, inflammatory bowel disease; n, number of patients; SD, standard deviation; US, United States. | | | | |

Table S2 RA symptomsa

|  | **US (n=30)** | **Europe (n=60)** | **Brazil (n=10)** | **Total (n=100)** |
| --- | --- | --- | --- | --- |
| **Current RA symptom location,b n (%)** |  |  |  |  |
| Hands, wrists, fingers | 25 (83.3) | 40 (66.7) | 10 (100.0) | 75 (75.0) |
| Hips | 4 (13.3) | 7 (11.7) | 1 (10.0) | 12 (12.0) |
| Knees | 15 (50.0) | 16 (26.7) | 9 (90.0) | 40 (40.0) |
| Feet, ankles | 15 (50.0) | 29 (48.3) | 7 (70.0) | 51 (51.0) |
| Back, neck | 14 (46.7) | 30 (50.0) | 9 (90.0) | 53 (53.0) |
| Other | 1 (3.3) | 3 (5.0) | 1 (10.0) | 5 (5.0) |
| No symptoms | 0 (0) | 2 (3.3) | 0 (0) | 2 (2.0) |
| **Disease and symptom progression since diagnosis,c n (%)** |  |  |  |  |
| Better | 21 (70.0) | 30 (50.0) | 8 (80.0) | 59 (59.0) |
| No change | 5 (16.7) | 6 (10.0) | 1 (10.0) | 12 (12.0) |
| Worse | 9 (30.0) | 26 (43.3) | 0 (0.0) | 35 (35.0) |
| **Most bothersome symptom,d n (%)** |  |  |  | **(n=94)** |
| **Location of symptom** |  |  |  |  |
| Hands, wrists, fingers |  |  |  | 31 (33.0) |
| Feet, ankles |  |  |  | 14 (14.9) |
| Legs, knees |  |  |  | 12 (12.8) |
| Arms, elbows |  |  |  | 5 (5.3) |
| Joints (unspecified location) |  |  |  | 5 (5.3) |
| Back, neck, shoulders |  |  |  | 5 (5.3) |
| Hips |  |  |  | 2 (2.1) |
| **Type of symptom** |  |  |  |  |
| Pain |  |  |  | 53 (56.4) |
| Mobility, function loss, limitations |  |  |  | 13 (13.8) |
| Stiffness |  |  |  | 10 (10.6) |
| Fatigue |  |  |  | 8 (8.5) |
| Inflammation/swelling |  |  |  | 7 (7.5) |
| Numbness |  |  |  | 1 (1.1) |
| **Notes:** aAll variables were patient-reported. All variables except current RA symptom location were obtained from the recruitment screening items. bMultiple response item; responses sum to over 100%. cPatients were asked whether their symptoms had changed since the time they were diagnosed, and in what way. dPatients were asked which of their RA symptoms they found most bothersome, and could report more than one most bothersome symptom, including the symptom location and/or type; six patients reported no bothersome symptoms. **Abbreviations:** n, number of patients; RA, rheumatoid arthritis; US, United States. | | | | |

Table S3 Illustrative quotations from patients in the US, Europe, and Brazil: most commona reasons for choosing oral administration, self-injection, infusion, and clinic-injection as the most-preferred mode

| Most common reasons | Illustrative quotations [patient country of origin] |
| --- | --- |
| For choosing oral administration |  |
| Speed of administration | Quick, fast. [US]  You spend one second in doing it; it is just taking the pills and swallowing them. [Spain]  You take it right there with some water at any time. [Brazil] |
| Ease of administration | It’s just easier, less pain. No sticks, know what I’m saying? That’s what I think, there’s no pain when you swallow a pill. [US]  I swallow the pill with a little water, and that’s it. [Switzerland]  They are tiny, I swallow them quickly. [Brazil] |
| Portability | If you travel you travel, we all got a life, what’s easier? Just take and go. [US]  You are not at home; you are independent. I can put it in my handbag, in my pillbox. No matter where I am, I can take it quickly wherever I am. [Germany]  You don’t need to store it in the fridge. [Brazil] |
| For choosing self-injection |  |
| Speed of administrationb | If I had to do a needle, I’d rather do the one I can just do myself. It’s quicker. [US]  It is fast and comfortable. [Spain] |
| Frequency of dosingb | Convenience for me means the less I have to deal with it. [US]  It is one injection per month. Once it’s done, then you don’t have to worry about the treatment during the month. [France] |
| Having a feeling of controlb | I have more control over it. I don’t have to make an appointment to go to the doctor. [US]  It seems sensible to do it yourself because you can do it when you want to do it. [UK] |
| For choosing infusion |  |
| Less-frequent dosing | I’m doing it once a month, maybe it’s not so bad on your body. [US]  You do it once, and then you don’t think about for a month. [France]  Although I lose a day, it’s just one day, and that’s it. There is no weekly commitment or daily commitment. [Brazil] |
| Feelings of safety and care | I might have the infusion, make her constantly check my liver. [US]  The tranquility of being monitored in a protected environment. [Italy]  In case I experience any sort of side effect there will be a responsible healthcare professional to assist me. [Brazil] |
| For choosing clinic-injection |  |
| Feels comfortable with experts administeringc | It is not painful when it is others who do the injection. There is no apprehension. [France]  Every time I go, I get a shot with the nurse, a health professional who knows what she is doing. [Brazil] |
| Prefers someone else to administerb,c | Administering it at the doctor’s rooms is still convenient for me, because I do not have to do it myself. [Switzerland]. |
| Works betterc, d | It’s more effective. [Brazil] |
| Works fasterc | In my opinion the injection is entering the body faster than the tablets and the effect is faster. [Germany]  The effect is much quicker than taking a pill. [Brazil] |
| Feelings of safety and care | When I go, it’s not only just for the injections, it’s for conversation. I go to the doctor and then he checks other things. [US]  I am at the GP on a weekly basis anyway, and then I can quickly see him. So if there really is something wrong, he is there then. [Switzerland]  It’s safer. If a professional nurse or physician is performing the procedure it’s safer. If anything happens, a side effect for instance, that person will be able to help you. [Brazil] |
| Fast to administerb, c | I can go in there quickly in the morning; the assistant gives me the injection, and I am gone already. [Switzerland] |
| **Note:** aReported by ≥25% of patients. bNo quotations from patients in Brazil. cNo quotations from patients in the US. dNo quotations from patients in Europe.  **Abbreviations:** GP, general practitioner; UK, United Kingdom; US, United States. | |

Table S4 Illustrative quotations from patients in the US, Europe and Brazil: most commona reasons for not choosing oral administration, self-injection, infusion, and clinic-injection as the most-preferred mode

| Most common reasons | Illustrative quotations [patient country of origin] |
| --- | --- |
| For not choosing oral administration |  |
| Reluctance to take another pillb | Sometimes it feels kind of overwhelming or like it’s overtaking me to see all these medications and all the bottles. [US]  If there is something that decreases the amount of pills that I take, it will be very welcomed. [Spain] |
| Difficulty remembering | If you get real busy and have to just run in and grab a little quick bite of lunch, sometimes you do forget. [US]  You always have to think about it, not forgetting the pill. [Germany]  It would be a good thing not having to take the pills every day because I forget to take them sometimes. [Brazil] |
| Possible drug-drug interactionsb | I take some other pills. I just don’t like mixing all that stuff. [US]  I have to take stomach protectors if I take pills. [Spain] |
| For not choosing self-injection |  |
| Avoidance of pain due to needles | Even though it’s 10 seconds, it hurts. [US]  I felt pain at the injection site. After the injection, the site was always swollen and very sensitive for a long time. [France]  It can’t touch a vein because if it touches a vein it hurts, it burns. [Brazil] |
| Avoidance of needles | I don’t like puncturing my skin. [US]  Nobody likes pricking themselves, it’s not pleasant. [UK]  I hate needles. I hate it. It scares me just to think about having to take an injection every week. No way! [Brazil] |
| Difficulty when travellingb | You have to keep it cold and you have to have it in a pack, and you have to have the letter getting you through the airport saying you can have it. [US]  When I’m not at home, on holiday, away, it’s much harder to take those with me. [UK] |
| Need to refrigerateb | [Some drugs] could stay out for 14 days out of the refrigerator. So travelling with it was very easy. But [others] can only stay out of the refrigerator for 1 hour. [US]  Having to refrigerate the injection is a disadvantage. I have to be very careful because the temperature has to be constant. [Spain] |
| For not choosing infusion |  |
| Inconvenient | Whereas when you’re doing something at home, then you’re not taking time out of your schedule and appointments and all. [US]  I have wasted the entire day, and I have to take a day off from work. [Italy]  If it was at a clinic I would have to go there and then stay there for 2 hours in observation. [Brazil] |
| Long infusion time | It seems to be the one that takes the longest and is the most tedious. [US]  It is not fun that you have to lie in hospital for a few hours. [Switzerland]  The sessions are very long. [Brazil] |
| For not choosing clinic-injection |  |
| Inconvenient | The inconvenience of having to make the appointment and having to go to the doctor. [US]  Suffering from RA makes it more difficult going anywhere and I need to rest more than other people. [Spain] |
| **Note:** aReported by ≥25% of patients. bNo quotations from patients in Brazil.  **Abbreviations:** GP, general practitioner; RA, rheumatoid arthritis; UK, United Kingdom; US, United States. | |

Table S5 Dislikes for the oral mode and self-injection mode by strong oral and strong self-injection first choices

|  | **A: Strong oral mode preference**  **(n=35), %** | **B: Strong self-injection mode preference**  **(n=13), %** | **Difference between A and B,**  **% points** |
| --- | --- | --- | --- |
| **Oral dislikes** |  |  |  |
| Hard to remember | 17.1 | 53.8 | -36.7 |
| Want to reduce daily pills | 14.3 | 30.8 | -16.5 |
| Possible interactions with other pills (in stomach) | 8.6 | 15.4 | -6.8 |
| Works slower | 0.0 | 15.4 | -15.4 |
| Have to take with food | 2.9 | 15.4 | -12.5 |
| Hard to swallow pills | 8.6 | 7.7 | 0.9 |
| Have to carry pills | 0.0 | 0.0 | 0.0 |
| Makes me feel like a sick person | 0.0 | 0.0 | 0.0 |
| Frequency of dosing | 8.6 | 0.0 | 8.6 |
| Packaging | 2.9 | 0.0 | 2.9 |
| Taste | 0.0 | 0.0 | 0.0 |
| **Self-injection dislikes** |  |  |  |
| Avoid needles/sticking self  with needle | 51.4 | 0.0 | 51.4 |
| Avoid pain (needle-stick site) | 51.4 | 7.7 | 43.7 |
| Have to get psyched up to stick self (dread it) | 34.3 | 7.7 | 26.6 |
| Hard to handle/manipulate with hands | 14.3 | 0.0 | 14.3 |
| Difficulties traveling (refrigeration, preparation, disposal) | 25.7 | 15.4 | 10.3 |
| Avoid pain (burning sensation) | 17.1 | 7.7 | 9.5 |
| Avoid preparation/disposal | 20.0 | 15.4 | 4.6 |
| Want someone else to do it | 11.4 | 7.7 | 3.7 |
| Have to refrigerate, monitor temperature | 25.7 | 23.1 | 2.6 |
| Hard to remember | 8.6 | 7.7 | 0.9 |
| Difficulties with delivery | 5.7 | 7.7 | -2.0 |
| Don’t want another needle | 2.9 | 7.7 | -4.8 |
| Abbreviation: n, number of patients. |  |  |  |

Table S6 Subgroup comparison trends

|  | **Higher preference (mean or proportion) for…** | | |
| --- | --- | --- | --- |
| **Subgroup comparisons**  **(dichotomy, n)** | **Oral mode among…** | **Self-injection mode among…** | **Infusion mode among…** |
| Sex  (male, 25; female, 75) | Male | _ | _ |
| Education level  (below college level, 58; college degree or higher, 41) | College degree+ | _ | _ |
| Race  (white, 81; not white, 14) | Not white | _ | _ |
| Relationship status  (dual household, 73; single, 25) | Dual household | Dual household | _ |
| Additional health conditions  (0, 53; 1+, 47) | 0 conditions | _ | 1+ conditions |
| Current RA fatigue, 0–10 NRS  (0–4, 43; 5–10, 56) | 0–4 | 5–10 | _ |
| Employment  (yes, 51; no, 49) | _ | Not employed | _ |
| Current smoker  (yes, 16; no, 84) | _ | Yes | _ |
| Median income  (>median, 47; <median, 32 per country) | _ | >Median income | <Median income |
| Daily meds  (0–2, 36; 3+, 64) | _ | 3+ | 0–2 |
| bDMARD satisfaction, 0–10 NRS  (0–7, 20; 8–10, 40) | _ | _ | 8–10 |
| csDMARD satisfaction, 0–10 NRS  (0–7, 32; 8-10, 35) |  | 0–7 |  |
| Having injections, current  (yes, 57; no, 43) | _ | Yes, currently having injections | Not currently having injections |
| Taking biologics, current  (yes, 56; no, 44) | Not currently taking biologics | _ | _ |
| Taking orals, current  (yes, 60; no, 40) | Yes, currently taking orals | _ | _ |
| Receiving infusions, current  (yes, 14; no, 86) | Not currently receiving infusions | _ | Currently receiving infusionsa |
| Past MTX experience (ever)  (yes, 81; no, 19) | Past MTX experience | _ | _ |
| Past injection experience (ever)  (yes, 79; no, 21) | _ | Past injection experience | Injection-naïve |
| Past biologics experience (ever)  (yes, 70; n, 30) | _ | Biologic-naïve | _ |
| Past infusion experience (ever)  (yes, 37; no, 63) | _ | No infusion experience | _ |
| **Notes:** a*P*<0.05. The proportions of patients for each first-choice mode were compared; differences of 10% or more were highlighted. Differences of 20% or more were generally needed for statistical significance. The preference point means and standard deviations for each mode were compared, and effect sizes (Cohen’s *d*) were computed. The largest effect size observed was ‘small’ (ie 0.2 to 0.4) and these were highlighted. No medium (0.5+) or large (0.8+) effect sizes were found, except one large at 0.8 for infusion.  **Abbreviations:** bDMARD, biologic DMARD; csDMARD, conventional synthetic DMARD; DMARD, disease-modifying antirheumatic drug; MTX, methotrexate; n, number of patients in subgroup; NRS, numerical rating scale; RA, rheumatoid arthritis. | | | |
